# Supplementary material
Source: HighWire-hosted journal article supplement (http://qualitysafety.bmj.com/highwire/filestream/147697/field_highwire_adjunct_files/1/bmjqs-2013-002243supp_AppendixB.pdf)
Supplement: bmjqs-2013-002243supp_AppendixB.pdf [file bmjqs-2013-002243supp_AppendixB.pdf]

# SBAR Medication Checklist

## Identify & Situation

Introduction and reason for call

- ☐ Name of Practitioner: \_\_\_\_\_
- ☐ Your Name: \_\_\_\_\_
- ☐ Your Position: \_\_\_\_\_
- ☐ Name of Patient: \_\_\_\_\_
- ☐ Age of Patient: \_\_\_\_\_
- ☐ Patient Location: \_\_\_\_\_
- ☐ State Problem: \_\_\_\_\_
- ☐ Time of Onset: \_\_\_\_\_
- ☐ Severity: \_\_\_\_\_
- ☐ State if call is urgent: \_\_\_\_\_

Notes:

---

---

---

---

---

---

---

---

---

---

---

---

---

---

---

---

---

---

---

---

---

---

---

---

## Background: Current Status and Pertinent History

### Current Status

- ☐ Associated signs & symptoms: \_\_\_\_\_
- ☐ Current VS + deviation from patient's norm: \_\_\_\_\_  
\_\_\_\_\_
- ☐ Current Medications: \_\_\_\_\_
- ☐ Name, dose, frequency, route of requested medication  
ordered/requested: \_\_\_\_\_
- ☐ Indication of ordered/requested medication: \_\_\_\_\_
- ☐ If call is about a medication order: who ordered the medication  
and when was the order written: \_\_\_\_\_
- ☐ Current electrolytes (K<sup>+</sup>, NA<sup>+</sup>, CO<sub>2</sub>, Cl): \_\_\_\_\_
- ☐ Routine or PRN interventions pertinent to problem: \_\_\_\_\_

### Previous History

- ☐ Reason for Hospitalization: \_\_\_\_\_
- ☐ Admitting/ Working Diagnosis: \_\_\_\_\_
- ☐ Past Medical History: \_\_\_\_\_
- ☐ Previous calls for same problems: \_\_\_\_\_
- ☐ Drug allergies or adverse reactions: \_\_\_\_\_

## Assessment

State your assessment of the situation

---

---

---

## Recommendation / Request

Request or Recommend Intervention

---

---

---

# SBAR Blood Glucose Checklist

## Identify & Situation

Introduction and reason for call

- ☐ Person Called: \_\_\_\_\_
- ☐ Your Name: \_\_\_\_\_
- ☐ Your Position: \_\_\_\_\_
- ☐ Your Location: \_\_\_\_\_
- ☐ Name of Patient: \_\_\_\_\_
- ☐ Age of Patient: \_\_\_\_\_
- ☐ Patient Location: \_\_\_\_\_
- ☐ State Problem: \_\_\_\_\_
- ☐ Time of Onset: \_\_\_\_\_
- ☐ Severity: \_\_\_\_\_
- ☐ State if call is urgent: \_\_\_\_\_

Notes:

---

---

---

---

---

---

---

---

---

---

---

---

---

---

---

---

---

---

---

---

---

---

---

---

## Background: Current Status and Pertinent History

### Current Status

- ☐ Current Glucose Reading: \_\_\_\_\_
- ☐ Previous Glucose Reading: \_\_\_\_\_
- ☐ Associated Signs & Symptoms: \_\_\_\_\_
- ☐ Current diet: \_\_\_\_\_
- ☐ Current Electrolytes ( $K^+$ ,  $Na^+$ ,  $CO_2$ ,  $Cl$ ): \_\_\_\_\_
- ☐ Current creatinine: \_\_\_\_\_
- ☐ Current VS + any deviation from patient's norm: \_\_\_\_\_
- ☐ Current Medications: \_\_\_\_\_

### Pertinent History

- ☐ Reason for Hospitalization: \_\_\_\_\_
- ☐ Admitting/ Working Diagnosis: \_\_\_\_\_
- ☐ Past Medical History: \_\_\_\_\_
- ☐ Chronic/ Pre-hospitalization medications for glucose control: \_\_\_\_\_
- ☐ Time & Dose of Last Glucose Control Medication (oral hypoglycemic or insulin): \_\_\_\_\_
- ☐ Presence/Absence of Sliding Scale Insulin Order – date, time, & last dose administered: \_\_\_\_\_
- ☐ Presence/Absence of missed hypoglycemia dose in past 24 hours: \_\_\_\_\_
- ☐ Presence/Absence of infusing IV + type of fluid: \_\_\_\_\_
- ☐ Presence/Absence of labile glucose history: \_\_\_\_\_
- ☐ Routine or PRN interventions pertinent to problem: \_\_\_\_\_
- ☐ Mental Status: \_\_\_\_\_
- ☐ Skin color, temperature, & moistness: \_\_\_\_\_
- ☐ Previous calls for same problem: \_\_\_\_\_
- ☐ Drug allergies or adverse reactions: \_\_\_\_\_

## Assessment

State your assessment of the situation

---

---

---

## Recommendation / Request

Request or Recommend Intervention

---

---

---





# SBAR Elevated Temperature Checklist

## Identify & Situation

Introduction and reason for call

- ☐ Person Called: \_\_\_\_\_
- ☐ Your Name: \_\_\_\_\_
- ☐ Your Position: \_\_\_\_\_
- ☐ Your Location: \_\_\_\_\_
- ☐ Name of Patient: \_\_\_\_\_
- ☐ Age of Patient: \_\_\_\_\_
- ☐ Patient Location: \_\_\_\_\_
- ☐ State Problem: \_\_\_\_\_
- ☐ Time of Onset: \_\_\_\_\_
- ☐ Severity: \_\_\_\_\_
- ☐ State if call is urgent: \_\_\_\_\_

Notes:

---

---

---

---

---

---

---

---

---

---

---

---

---

---

---

---

---

---

---

---

---

---

---

---

## Background: Current Status and Pertinent History

### Current Status

- ☐ Current temperature & method of measurement (oral, ear, axillary, rectal): \_\_\_\_\_
- ☐ Temperature high & low reading over past 24 hours + method of measurement (oral, ear, axillary, rectal): \_\_\_\_\_
- ☐ Associated Signs & Symptoms: \_\_\_\_\_
- ☐ Skin color, temperature, moisture: \_\_\_\_\_
- ☐ Presence/Absence of redness, swelling, temperature, tenderness around incision site: \_\_\_\_\_
- ☐ Presence/ Absence of SOB, chest pain, cough: \_\_\_\_\_
- ☐ Presence/Absence of calf tenderness/warmth: \_\_\_\_\_
- ☐ Presence/Absence of difficulty voiding or change in urine color: \_\_\_\_\_
- ☐ Current VS + any deviation from patient's norm: \_\_\_\_\_
- ☐ Current Medications: \_\_\_\_\_

### Previous History

- ☐ Reason for Hospitalization: \_\_\_\_\_
- ☐ Admitting/ Working Diagnosis: \_\_\_\_\_
- ☐ Past Medical History: \_\_\_\_\_
- ☐ Presence/Absence of chest X-ray findings & date of X-ray: \_\_\_\_\_
- ☐ Presence/Absence of antibiotics: \_\_\_\_\_
- ☐ Presence/Absence of cultures & date of findings: \_\_\_\_\_
- ☐ Presence/Absence of antipyretic medications & time last administered: \_\_\_\_\_
- ☐ Routine or PRN interventions pertinent to problem: \_\_\_\_\_
- ☐ Previous calls for same problem: \_\_\_\_\_
- ☐ Drug allergies or adverse reactions: \_\_\_\_\_

## Assessment

State your assessment of the situation

---

---

---

## Recommendation / Request

Request or Recommend Intervention

---

---

---

# SBAR Pain Checklist

## Identify & Situation

Introduction and reason for call

- ☐ Person Called: \_\_\_\_\_
- ☐ Your Name: \_\_\_\_\_
- ☐ Your Position: \_\_\_\_\_
- ☐ Your Location: \_\_\_\_\_
- ☐ Name of Patient: \_\_\_\_\_
- ☐ Age of Patient: \_\_\_\_\_
- ☐ Patient Location: \_\_\_\_\_
- ☐ State Problem: \_\_\_\_\_
- ☐ Time of Onset: \_\_\_\_\_
- ☐ Severity: \_\_\_\_\_
- ☐ State if call is urgent: \_\_\_\_\_

Notes:

---

---

---

---

---

---

---

---

---

---

---

---

---

---

---

---

---

---

---

---

---

---

---

---

## Background: Current Status and Pertinent History

### Current Status

- ☐ Location of pain: \_\_\_\_\_
- ☐ Cause of pain: \_\_\_\_\_
- ☐ Severity of pain: \_\_\_\_\_
- ☐ Quality of pain: \_\_\_\_\_
- ☐ Type and duration of pain episodes: \_\_\_\_\_
- ☐ Presence/Absence of radiation: \_\_\_\_\_
- ☐ Interventions that relieve pain: \_\_\_\_\_
- ☐ Factors that exacerbate pain: \_\_\_\_\_
- ☐ Associated signs & symptoms: \_\_\_\_\_
- ☐ State pertinent findings from physical assessment of patient: \_\_\_\_\_

- ☐ Current VS + deviation from patient's norm: \_\_\_\_\_
- ☐ Current Medications: \_\_\_\_\_

### Pertinent History

- ☐ Reason for Hospitalization: \_\_\_\_\_
- ☐ Admitting/ Working Diagnosis: \_\_\_\_\_
- ☐ Past Medical History: \_\_\_\_\_
- ☐ Pain medications administered, dose, time last administered, patient response: \_\_\_\_\_
- ☐ Routine or PRN interventions pertinent to problem: \_\_\_\_\_
- ☐ Previous calls for same problems: \_\_\_\_\_
- ☐ Drug allergies or adverse reactions: \_\_\_\_\_

## Assessment

State your assessment of the situation

---

---

---

## Recommendation / Request

Request or Recommend Intervention

---

---

---
